# Supplementary material
Source: Springer Nature journal article supplement (https://www.springermedizin.de/resource/supplementary/12874_2010_660_MOESM5_ESM.pdf/9432356)

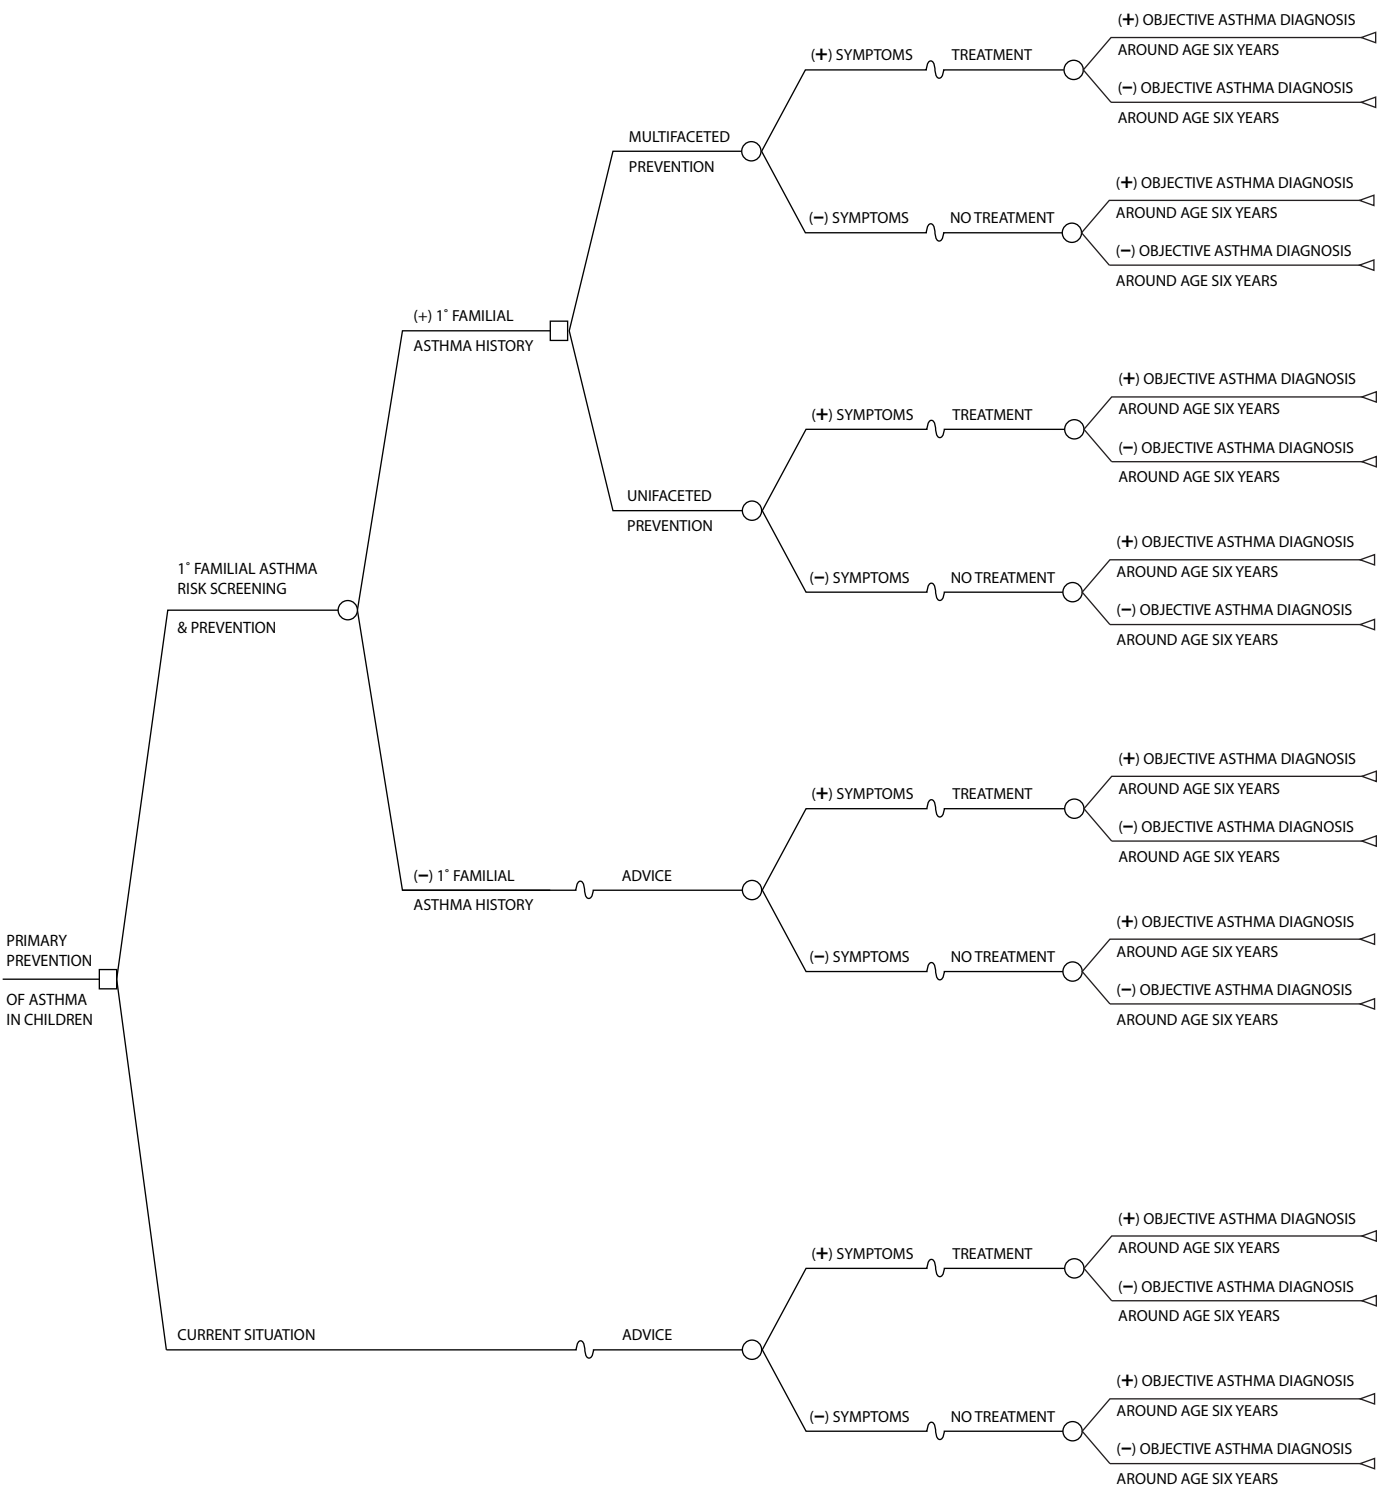

Legend:  - Decision Node   
  - Probability Node   
  - Terminal Node   
  - Action/Activity

Supplement: MOESM5 [file 9432356]
